# Supplementary material
Source: publisher figshare collection journal article supplement (https://tandf.figshare.com/ndownloader/files/24421296)
Supplement: Supplementary file 1 [file 24421296]

| Building design and construction strategies for a circular economy                 |                                                                                                                                                                                                                                                                                                                                                                                                                                                                                                                                                                                                                                                                                                                                                                                 |
|------------------------------------------------------------------------------------|---------------------------------------------------------------------------------------------------------------------------------------------------------------------------------------------------------------------------------------------------------------------------------------------------------------------------------------------------------------------------------------------------------------------------------------------------------------------------------------------------------------------------------------------------------------------------------------------------------------------------------------------------------------------------------------------------------------------------------------------------------------------------------|
| Systematic Literature Review Protocol (based on de Almeida Biolchini et al., 2007) |                                                                                                                                                                                                                                                                                                                                                                                                                                                                                                                                                                                                                                                                                                                                                                                 |
| Protocol Steps                                                                     | Answers or Definitions                                                                                                                                                                                                                                                                                                                                                                                                                                                                                                                                                                                                                                                                                                                                                          |
| Data collection                                                                    |                                                                                                                                                                                                                                                                                                                                                                                                                                                                                                                                                                                                                                                                                                                                                                                 |
| 1. Question Formularization                                                        |                                                                                                                                                                                                                                                                                                                                                                                                                                                                                                                                                                                                                                                                                                                                                                                 |
| 1.1. Question Focus                                                                | To identify in which direction is the construction sector moving in terms of designing and constructing buildings for a circular economy i.e. state-of-the-art                                                                                                                                                                                                                                                                                                                                                                                                                                                                                                                                                                                                                  |
| 1.2. Question Quality and Amplitude                                                |                                                                                                                                                                                                                                                                                                                                                                                                                                                                                                                                                                                                                                                                                                                                                                                 |
| 1.2.1. Problem                                                                     | As more and more circular economy initiatives have emerged within recent years within the built environment it is increasingly important to understand what design and construction strategies are available/used in relation to circular economy how and to which degree they are applied in research and in practice (i.e. state-of-the-art) in order identify gaps and provide direction for future research to promote a more comprehensive circular economy adoption in the construction sector.                                                                                                                                                                                                                                                                           |
| 1.2.2. Question                                                                    | What are the existing/applied building design and construction strategies for a circular economy? How are they applied and what are their level of readiness (i.e. research level, research and development and/or building project application)?                                                                                                                                                                                                                                                                                                                                                                                                                                                                                                                               |
| 1.2.3. Keywords and Synonyms                                                       | <p>The main keywords are related to circular economy, buildings, strategies. A pre-search was used to help plan the search string and define synonyms of the main keywords in relation to the resources available. "Design" returned in too many irrelevant publications outside of the scope of the study at hand and was thus excluded as a keyword. To obtain more relevant results the keywords are targeted the publications' titles, abstracts and keywords.</p> <p><u>Main keywords and synonyms:</u></p> <ul style="list-style-type: none"> <li>• Circular economy: circle economy</li> <li>• Building: built environment, construction, civil engineering,</li> <li>• Strategy: approach, method, concept, principle, framework, guideline, guidance, guide</li> </ul> |
| 1.2.4. Intervention                                                                | The circular economy strategies/principles for building life cycle design will be observed and registered in a spreadsheet during the review process.                                                                                                                                                                                                                                                                                                                                                                                                                                                                                                                                                                                                                           |
| 1.2.5. Control                                                                     | None                                                                                                                                                                                                                                                                                                                                                                                                                                                                                                                                                                                                                                                                                                                                                                            |
| 1.2.6. Effect                                                                      | A comprehensive database of building design and construction strategies for a circular economy, classified according to                                                                                                                                                                                                                                                                                                                                                                                                                                                                                                                                                                                                                                                         |
| 1.2.7. Outcome Measure                                                             | -Number of desing and construction strategies<br>-Description of the strategies characteristics, level of application and readiness                                                                                                                                                                                                                                                                                                                                                                                                                                                                                                                                                                                                                                             |
| 1.2.8. Population                                                                  | - Scientific publications regarding building design and construction strategies in relation to circular economy<br>- Publications from private or public stakeholders engaged in circular economy in the building sector                                                                                                                                                                                                                                                                                                                                                                                                                                                                                                                                                        |
| 1.2.9. Application                                                                 | Circular economy and sustainability research fields within the built environemnt; researchers, industry practitioners e.g. designers and decision makers                                                                                                                                                                                                                                                                                                                                                                                                                                                                                                                                                                                                                        |
| Experimental Design                                                                | No statistical method will be applied                                                                                                                                                                                                                                                                                                                                                                                                                                                                                                                                                                                                                                                                                                                                           |
| 2. Sources Selection                                                               |                                                                                                                                                                                                                                                                                                                                                                                                                                                                                                                                                                                                                                                                                                                                                                                 |
| 2.1. Sources Selection Criteria Definition                                         | Databases with available web-search mechanisms using keywords, high volume of indexed papers and proven relevance in the field of research as well as grey literature (i.e. non-peer-reviewed material) from relevant industry stakeholders e.g. Ellen MacArthur Foundation                                                                                                                                                                                                                                                                                                                                                                                                                                                                                                     |
| 2.2. Studies Languages                                                             | - English<br>- Danish publications were incuded as the authors native language is danish                                                                                                                                                                                                                                                                                                                                                                                                                                                                                                                                                                                                                                                                                        |
| 2.3. Sources Identification                                                        |                                                                                                                                                                                                                                                                                                                                                                                                                                                                                                                                                                                                                                                                                                                                                                                 |
| 2.3.1. Sources Search Methods                                                      | Web-based academic database search engines<br>Cross-references (backward snowballing)                                                                                                                                                                                                                                                                                                                                                                                                                                                                                                                                                                                                                                                                                           |
| 2.3.2. Search String                                                               | <p>("circular economy" OR "circle economy") AND ("built environment" OR building OR construction OR "civil engineering") AND (approach OR method OR strategy OR concept OR framework OR principle OR taxonomy OR guideline OR guide)</p> <p>*Adaptions and adjustments to the string are made according to each database's rules for search queries.</p>                                                                                                                                                                                                                                                                                                                                                                                                                        |
| 2.3.3. Sources List                                                                | <p><u>Main database:</u> Scopus (content coverage: indexed references, peer-reviewed)<br/><u>Secondary database for cross checking:</u> topic search in Web of science (content coverage: indexed cited references, peer-reviewed) and title search (to limit the number of hits) in Google Scholar (content coverage: indexed cited references, peer-reviewed, grey literature) and as a control to make sure everything relevant has been captured</p> <p>As CE has lagely been developed in the grey literature Google Scholar was also used to capture grey literature</p>                                                                                                                                                                                                  |
| 2.4. Sources Selection after Evaluation                                            | Scopus; Web of Science; google scholar, cross references.                                                                                                                                                                                                                                                                                                                                                                                                                                                                                                                                                                                                                                                                                                                       |
| 2.5. References Checking                                                           | N/A                                                                                                                                                                                                                                                                                                                                                                                                                                                                                                                                                                                                                                                                                                                                                                             |
| 3. Studies Selection                                                               |                                                                                                                                                                                                                                                                                                                                                                                                                                                                                                                                                                                                                                                                                                                                                                                 |
| 3.1. Studies Definition                                                            |                                                                                                                                                                                                                                                                                                                                                                                                                                                                                                                                                                                                                                                                                                                                                                                 |
| 3.1.1. Studies Inclusion and Exclusion Criteria Definition                         | <p>The studies must meet the following inclusion criteria:</p> <ol style="list-style-type: none"> <li>1) contain at least one building design and construction strategy that is explicitly related to the circular economy concept</li> <li>2) the strategy must focus on the building's resources and embodied environmental impacts.</li> <li>3) The design and construction strategy must focus solely on the design and construction of new buildings thus excluding building renovation as well as building extensions</li> <li>3) The study must provide a sufficient level of information i.e. information about the strategies application in a building context</li> </ol>                                                                                             |
| 3.1.2. Studies Types Definition/ Qualification Criteria                            | <p>- Journal papers, conference papers and grey literature will be selected regardless of their research approach.</p> <p>- Primary data (i.e. original studies/sources) is included</p> <p>- As the CE concept builds on a large body of pre-existing work of which the construction sector is consolidating, secondary data (i.e. systematic comparisons between primary studies) is includede to obtain aggregated information.</p>                                                                                                                                                                                                                                                                                                                                          |
| 3.1.3. Procedures for Studies Selection                                            | <p>The search strings must be run at the selected sources.</p> <p>The publications will be qualitatively selected according to three filters:</p> <p>Filter 1 - Reading the title, abstract, keywords</p> <p>Filter 2 - Reading the Introduction and Conclusion</p> <p>Filter 3 - Reading the full publication</p> <p>Finally, backward snowballing was performed i.e. using the reference list of the selected publications to identify new papers to include.</p>                                                                                                                                                                                                                                                                                                             |
| 3.2. Selection Execution                                                           |                                                                                                                                                                                                                                                                                                                                                                                                                                                                                                                                                                                                                                                                                                                                                                                 |
| Initial Studies Selection                                                          | Check 'Data Extraction' spreadsheet                                                                                                                                                                                                                                                                                                                                                                                                                                                                                                                                                                                                                                                                                                                                             |
| Studies Quality Evaluation                                                         | N/A                                                                                                                                                                                                                                                                                                                                                                                                                                                                                                                                                                                                                                                                                                                                                                             |
| Selection Review                                                                   | N/A                                                                                                                                                                                                                                                                                                                                                                                                                                                                                                                                                                                                                                                                                                                                                                             |
| Data analysis                                                                      |                                                                                                                                                                                                                                                                                                                                                                                                                                                                                                                                                                                                                                                                                                                                                                                 |
| 4. Information Extraction                                                          |                                                                                                                                                                                                                                                                                                                                                                                                                                                                                                                                                                                                                                                                                                                                                                                 |
| 4.1. Information Inclusion and Exclusion Criteria Definition                       |                                                                                                                                                                                                                                                                                                                                                                                                                                                                                                                                                                                                                                                                                                                                                                                 |
| 4.2. Data Extraction Forms                                                         | Coding was used for the information extraction of the selected publications. Check 'Data Extraction' spreadsheet                                                                                                                                                                                                                                                                                                                                                                                                                                                                                                                                                                                                                                                                |
| 4.3. Extraction Execution                                                          |                                                                                                                                                                                                                                                                                                                                                                                                                                                                                                                                                                                                                                                                                                                                                                                 |
| Objective Results Extraction                                                       |                                                                                                                                                                                                                                                                                                                                                                                                                                                                                                                                                                                                                                                                                                                                                                                 |
| i) Study Identification                                                            |                                                                                                                                                                                                                                                                                                                                                                                                                                                                                                                                                                                                                                                                                                                                                                                 |
| ii) Study Methodology                                                              |                                                                                                                                                                                                                                                                                                                                                                                                                                                                                                                                                                                                                                                                                                                                                                                 |
| iii) Study Results                                                                 |                                                                                                                                                                                                                                                                                                                                                                                                                                                                                                                                                                                                                                                                                                                                                                                 |
| iv) Study Problems                                                                 |                                                                                                                                                                                                                                                                                                                                                                                                                                                                                                                                                                                                                                                                                                                                                                                 |

|                                                |                                          |
|------------------------------------------------|------------------------------------------|
| Subjective Results Extraction                  |                                          |
| i) Information through authors                 |                                          |
| ii) General Impressions and Abstractions       |                                          |
| 4.4. Resolution of divergences among reviewers |                                          |
| 5. Results Summarization                       |                                          |
| 5.1. Results Statistical Calculus              |                                          |
| 5.2. Results Presentation in Tables            | Check sections 4 and 5 in the manuscript |
| 5.3. Sensitivity Analysis                      |                                          |
| 5.4. Plotting                                  |                                          |
| Data reporting                                 |                                          |
| 5.5. Final Comments                            | Check sections 4 and 5 in the manuscript |
| Number of Studies                              |                                          |
| Search, Selection and Extraction Bias          |                                          |
| Publication Bias                               |                                          |
| Inter-Reviewers Variation                      |                                          |
| Results Application                            |                                          |
| Recommendations                                |                                          |

### Data extraction

[illegible]





[illegible]

[illegible]





[illegible]
